# Supplementary material for: Aqueous acid-based synthesis of lead-free tin halide perovskites with near-unity photoluminescence quantum efficiency
Source: Royal Society of Chemistry journal article supplement (doi:10.1039/c9sc00453j), 2019-01-01

# A light bulb moment: Tin halides for brighter LEDs

Cost and energy efficient lamp prototypes use ultraviolet (UV) pumped white LED with coatings of photoluminescent yellow phosphor materials...

....which are environmentally toxic and unstable.

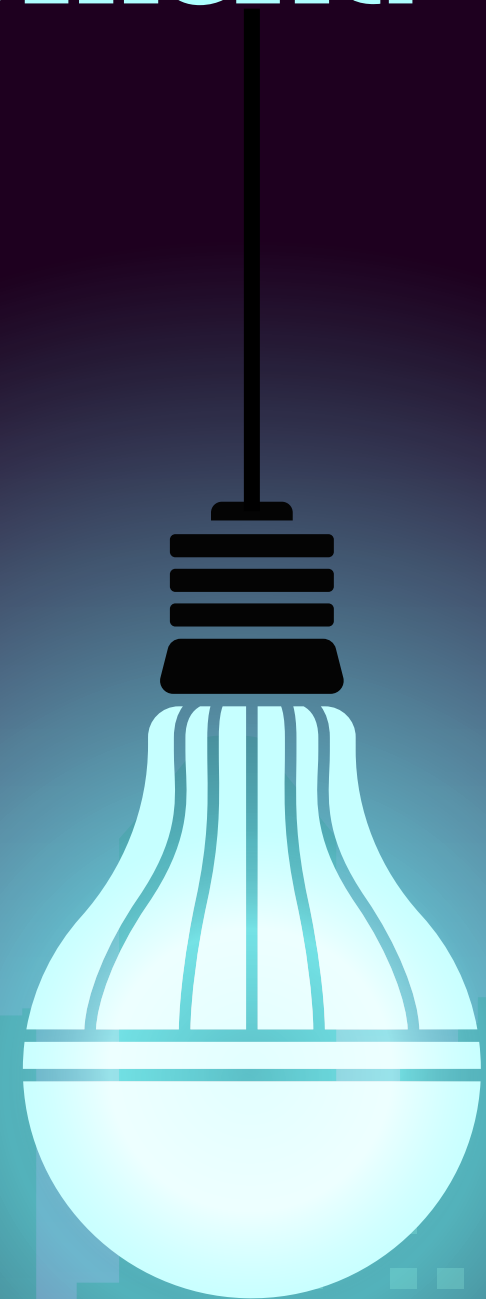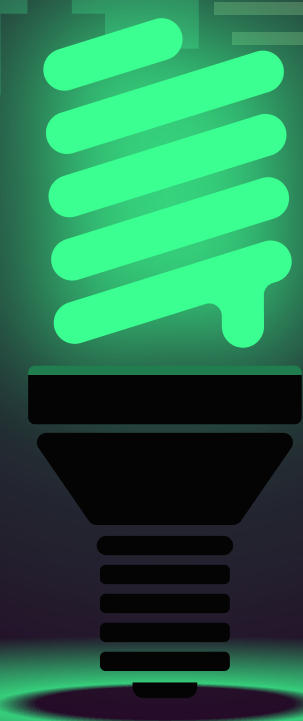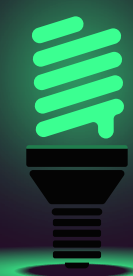

Using materials that are more environmentally friendly and non-toxic in the synthesis of fluorescent phosphors is essential.

## Synthesis of highly emissive tin halide perovskites.

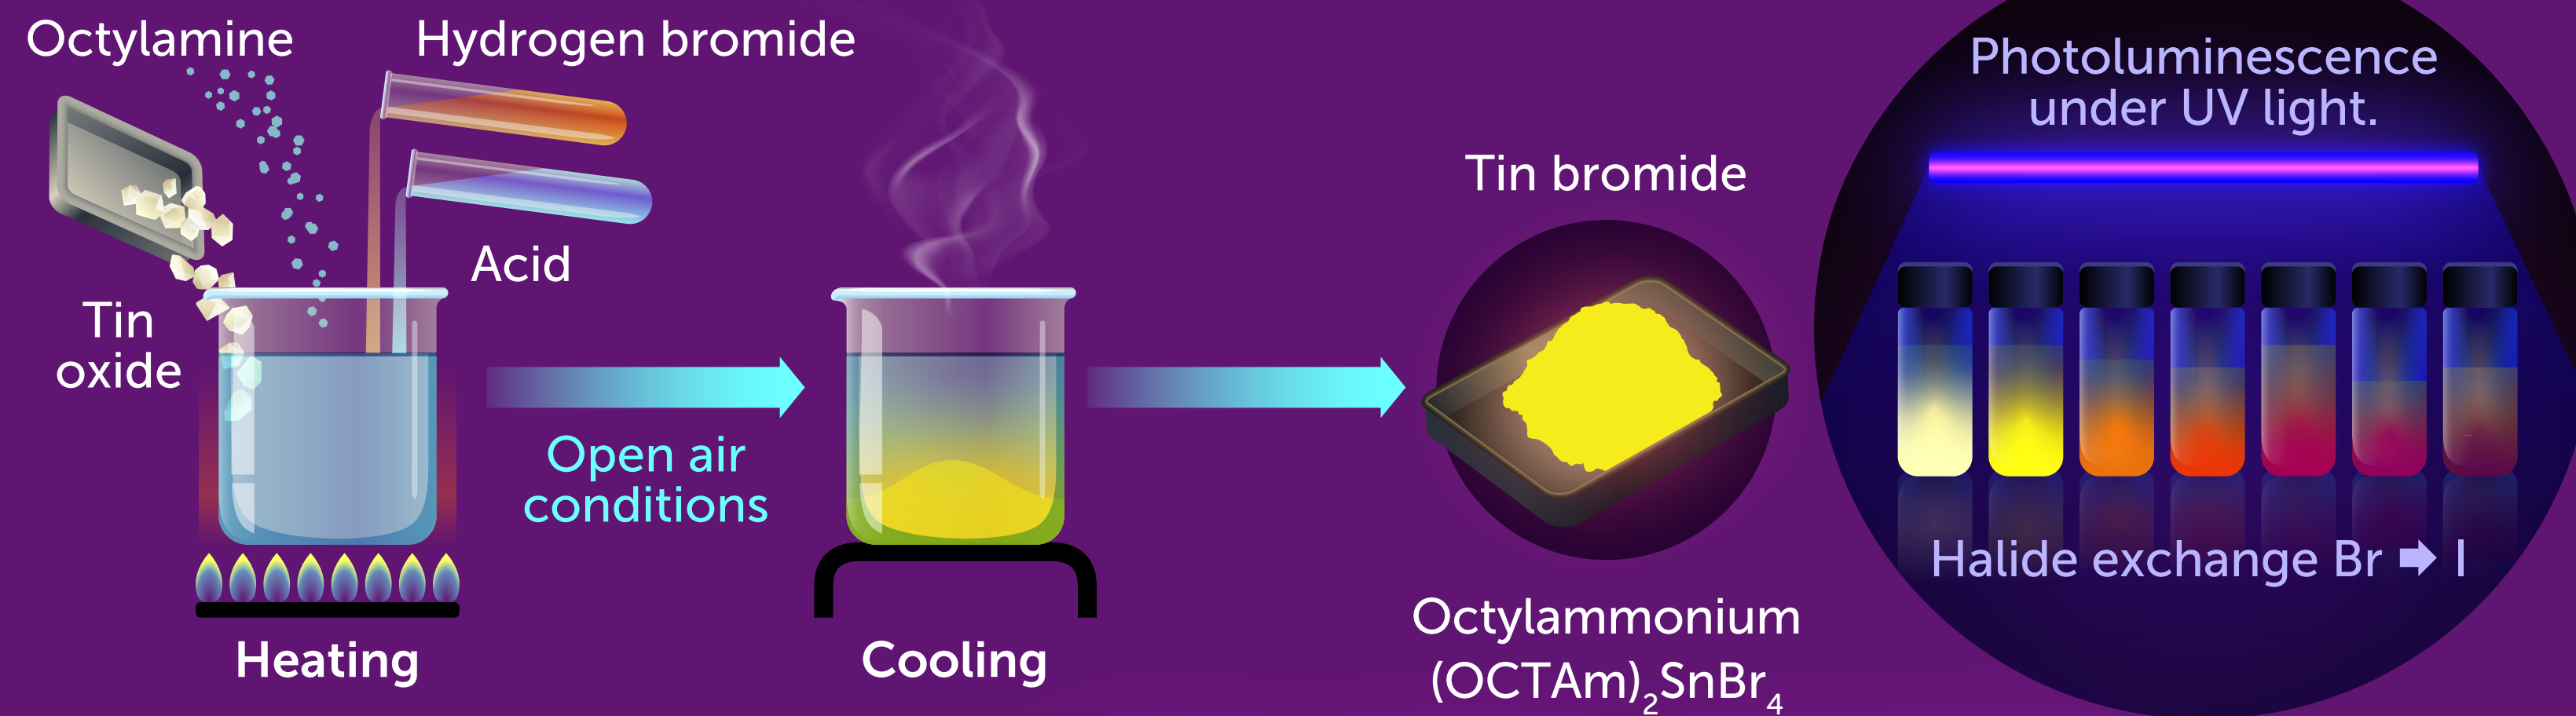

## What does this novel phosphor mean for the...

# FUTURE?

Superior photoluminescence

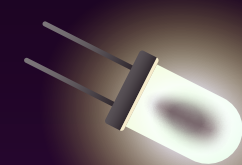

Easily reproducible in high yield

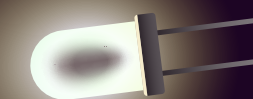

Environmentally safe

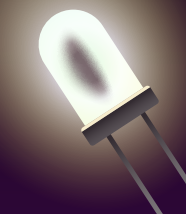

Highly stable

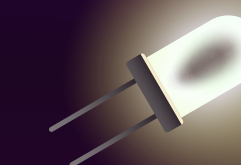

Excellent optical performance

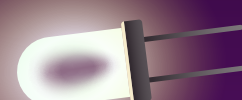

Ultra long life-time

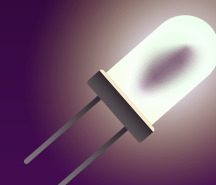

Covers full visible spectrum

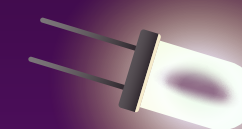

Excellent color rendering

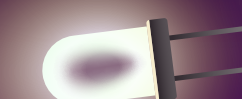

Synthesis of novel yellow emitting tin halide phosphors for more efficient environmentally friendly LEDs.

Chemical  
Science

PICK  
OF THE  
WEEK

Aqueous acid-based synthesis of lead-free tin halide perovskites with near-unity photoluminescence quantum efficiency

Wang, Nie, Deng *et al.* (2019)

DOI: 10.1039/C9SC00453J

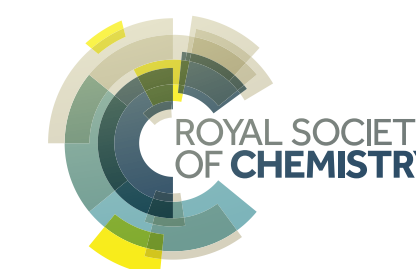

Supplement: c9sc00453j2.pdf [file c9sc00453j2.pdf]
