# Supplementary material for: Aqueous acid-based synthesis of lead-free tin halide perovskites with near-unity photoluminescence quantum efficiency
Source: Royal Society of Chemistry journal article supplement (doi:10.1039/c9sc00453j), 2019-01-01
Supplement: c9sc00453j1.pdf [file c9sc00453j1.pdf]

Electronic supplementary information for

## **Aqueous acid-based synthesis of lead-free tin halide perovskites with near-unity photoluminescence quantum efficiency**

Aifei Wang,<sup>a</sup> Yanyan Guo,<sup>a</sup> Zhaobo Zhou,<sup>b</sup> Xianghong Niu,<sup>c</sup> Yonggang Wang,<sup>d</sup> Faheem Muhammad,<sup>a</sup>  
Hongbo Li,<sup>e</sup> Tao Zhang,<sup>a</sup> Jinlan Wang,<sup>\*b</sup> Shuming Nie,<sup>\*af</sup> and Zhengtao Deng<sup>\*a</sup>

*a. College of Engineering and Applied Sciences, Nanjing National Laboratory of Microstructures, Nanjing University, Nanjing, Jiangsu, 210093, P.R. China*

*b. School of Physics, Southeast University, Nanjing 211189, P.R. China*

*c. School of Science, Nanjing University of Posts and Telecommunications, Nanjing 210046, People's Republic of China*

*d. Center for High Pressure Science and Technology Advanced Research (HPSTAR), Beijing 100949, P.R. China*

*e. College of Materials Science and Engineering, Beijing Institute of Technology, Haidian District, Beijing 100081 P.R. China*

*f. Departments of Bioengineering, Chemistry, Electrical and Computer Engineering, and Materials Science and Engineering, University of Illinois at Urbana-Champaign, Urbana, IL, USA.*

*Email: dengz@nju.edu.cn; jlwang@seu.edu.cn; nies@illinois.edu*

## EXPERIMENTAL SECTION

**Chemicals:** n-Octylamine (Aladdin, AR, 99%), Hypophosphorous acid ( $\text{H}_3\text{PO}_2$ , Aladdin, AR, 50 wt. % in  $\text{H}_2\text{O}$ ), Hydrobromic acid (HBr, Aladdin, AR, 48 wt. % in  $\text{H}_2\text{O}$ ), Hydroiodic acid (HI, Aladdin, AR, 55.0 - 58.0% with  $\leq 1.5$  %  $\text{H}_3\text{PO}_2$ ), Stannous Oxide ( $\text{SnO}$ , Aladdin, AR, 99%), Polystyrene (PS, Aladdin) were purchased and used without further purification.

**Synthesis of  $(\text{OCTAm})_2\text{SnBr}_4$ :** In a typical synthesis, stannous oxide (0.75 mmol) powder was dissolved in 2.5 mL hydrobromic acid by sonication until all  $\text{SnO}$  powder was dissolved. Then aqueous 15 mL  $\text{H}_3\text{PO}_2$  was added to avoid the oxidation of the tin, in the meantime, 475  $\mu\text{L}$  n-octylamine was added to the above tin-precursor solution under strong agitation. The solution was heated to 80  $^\circ\text{C}$  and maintained for 30 min. The colorless plate-like product with strong yellow fluorescence under UV light was slowly cooled at 4 $^\circ\text{C}$ . For the synthesis of  $(\text{OCTAm})_2\text{Sn}(\text{Br/I})_4$  or  $(\text{OCTAm})_2\text{SnI}_4$ , the variable compositions were obtained by simply changing the ratios of the halide ions.

**Synthesis of Other  $(\text{OCTAm})_2\text{SnX}_4$ :** The anion exchange reactions were conducted using  $(\text{OCTAm})_2\text{SnBr}_4$  as starting material, while hydroiodic acid was used as iodide source. Specifically, Hydroiodic acid was dropwise introduced into the starting solution under strong agitation for a few seconds and the complete anion exchange process was achieved within minutes.

**PS-Perovskite Composite Film Fabrication:** To obtain the film, firstly 25% Polystyrene (PS) dichloromethane solution was mixed with a certain amount of  $(\text{OCTAm})_2\text{SnBr}_4$  to get a turbid jelly-like solution. Then, the films were prepared by drop-casting the turbid jelly solution onto a glass slide and let it dried in ambient air.

**White LEDs Lamp Fabrication:** Various weight ratios of yellow  $(\text{OCTAm})_2\text{SnBr}_4$ , blue ( $\text{BaMgAl}_{10}\text{O}_{17}:\text{Eu}^{2+}$ ) and green (Eu doped silicates, G2762) phosphors were blended well with 25% Polystyrene (PS) dichloromethane solution. The blended phosphors of PS paste were dropped on 365 nm UV LED chip (1W) and dried in air to form white LEDs lamp.

**Characterization Details.** Powder X-ray diffraction (PXRD): PXRD was measured with a Bruker AXS D8 X-ray diffractometer equipped with monochromatized Cu K $\alpha$  radiation ( $\lambda=1.5418$  Å). The diffraction pattern was scanned over the angular range of 5-40 degree ( $2\theta$ ) with a step size of 0.03, at room temperature. Transmission electron microscopy (TEM): TEM was performed on an FEI Tecnai G2 F20 electron microscope operating at 200 kV. The available line resolution is about 0.1 nm. Scanning electron microscopy (SEM): SEM was performed on a ZEISS ULTRA55 electron microscope operating at 3.5 kV. Equipped with Energy-dispersive X-ray (EDX) detector. Steady State Photoluminescence Studies: The photoluminescence (PL) spectra were carried out with a Horiba PTI QuantaMaster 400 steady-state fluorescence system or with a homemade fiber fluorimeter system from Thorlabs operating under ambient conditions. Ultraviolet and Visible (UV–vis) Absorption Spectroscopy for Solid Samples: UV–vis spectra were recorded with a Shimadzu UV-3600 plus spectrophotometer equipped with an integrating sphere under ambient conditions. Absolute Photoluminescence Quantum Yields (PLQYs) Measurements for Solid Samples: The absolute fluorescence quantum yields were measured using a Horiba PTI QuantaMaster 400 steady-state fluorescence system with an integrated sphere and double-checked with a Hamamatsu Photonics Quantaurus-QY (model: C11347-11) under ambient conditions. Three independent experiments were done and the test errors of the absolute quantum yield values are below 1%. Time-Resolved Photoluminescence Lifetime Measurements for Solid Samples: Time-Resolved PL emission decay curves were collected at room temperature and detected by a Nikon Ni-U Microfluorescence Lifetime System (Confotec MR200, SOL, Belarus) with a 375 nm picosecond laser, and double-checked with a time-correlated single-photon counting system or a Hamamatsu Photonics Quantaurus-Tau (model: C11367-11) with 280 nm or 365 nm picosecond lasers under ambient conditions.

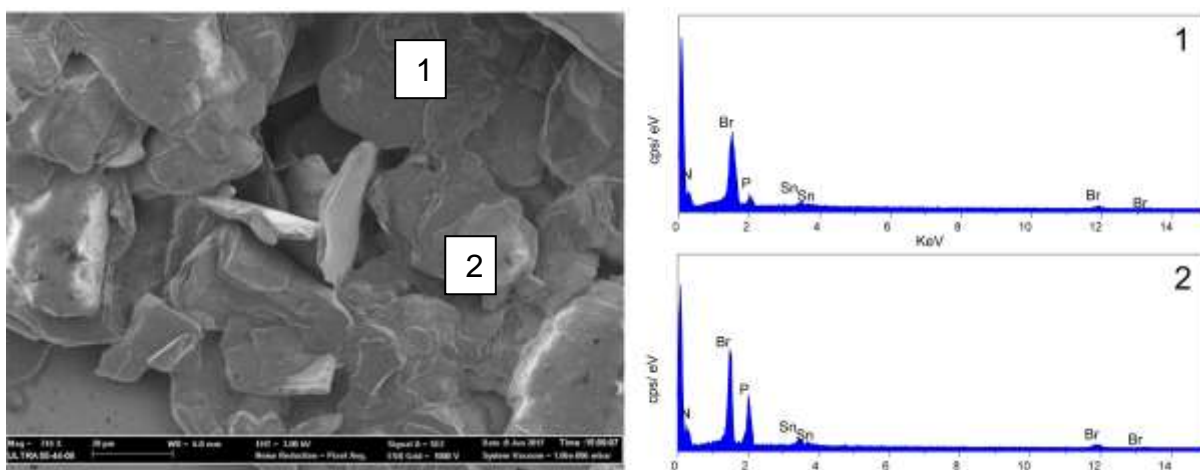

**Figure S1.** Additional scanning electron microscopy image of the as-prepared 2D (OCTAm)<sub>2</sub>SnBr<sub>4</sub> perovskites without purification and corresponding EDS spectra of different area in the same sample.

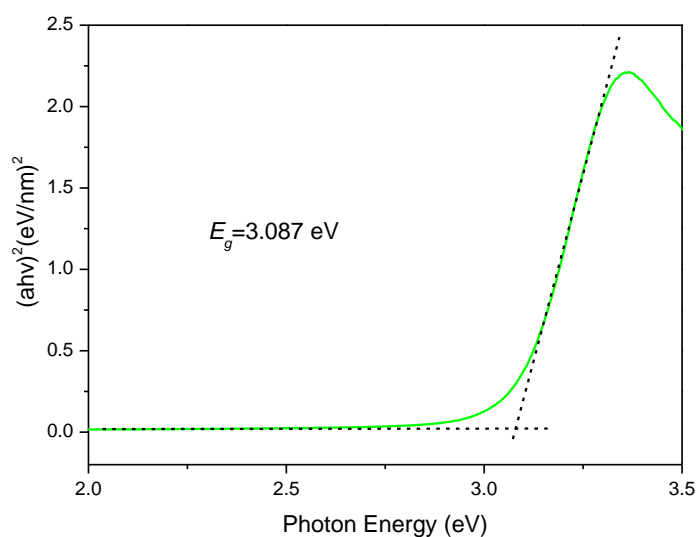

**Figure S2.** Plots of  $(ahv)^2$  vs photon energy ( $h\nu$ ) of 2D (OCTAm)<sub>2</sub>SnBr<sub>4</sub> perovskite.

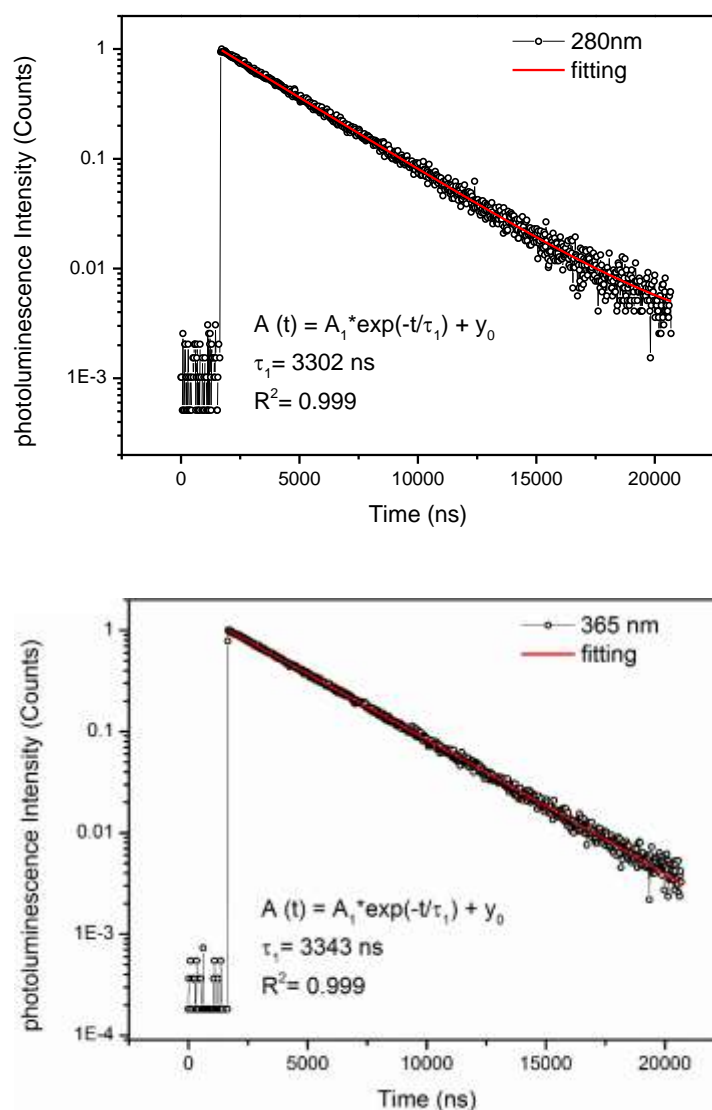

**Figure S3.** Time-resolved PL decay and the corresponding fitting curves of the 2D (OCTAm)<sub>2</sub>SnBr<sub>4</sub> perovskites with PL emission at 600 nm and excitation wavelength of 280 nm or 365 nm.

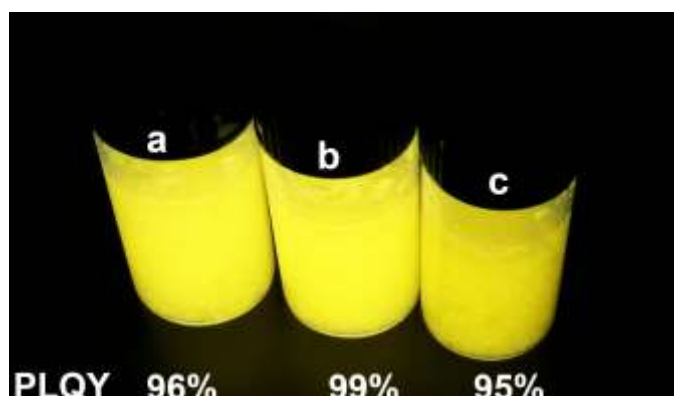

**Figure S4.** The photographs of products produced with different H<sub>3</sub>PO<sub>2</sub> concentrations (a-c, 50, 25 and 12.5 wt. %) under UV light.

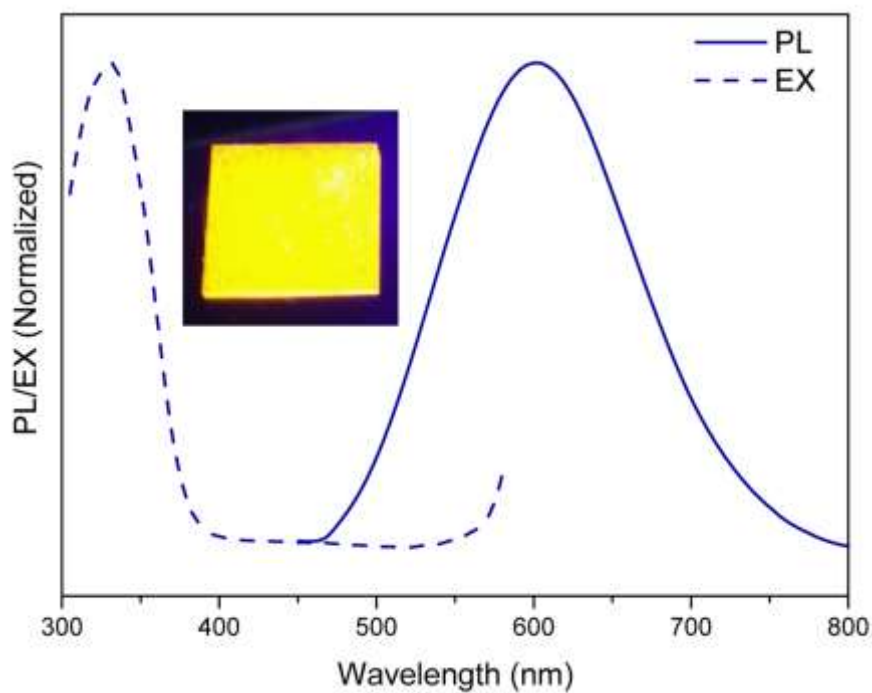

**Figure S5.** Normalized PL excitation (EX) and emission spectra (PL) of 2D (OCTAm)<sub>2</sub>SnBr<sub>4</sub> PS-perovskite composite film. The inset shows photograph of 2D (OCTAm)<sub>2</sub>SnBr<sub>4</sub> PS film under UV light.

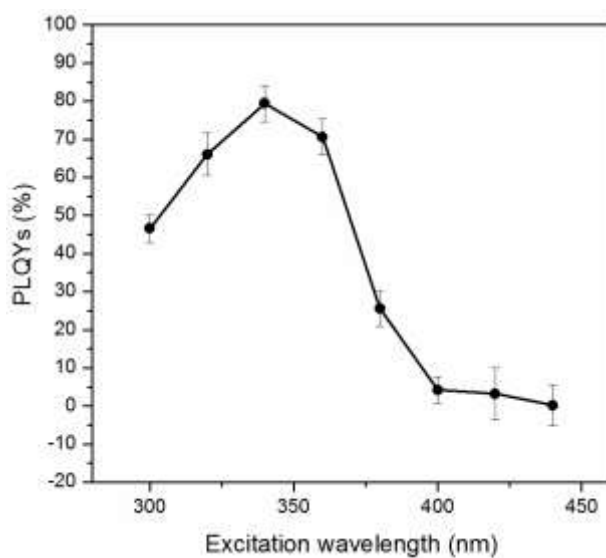

**Figure S6.** Absolute PL quantum yields spectrum of (OCTAm)<sub>2</sub>SnBr<sub>4</sub> PS-perovskite composite film under different excitation wavelength.

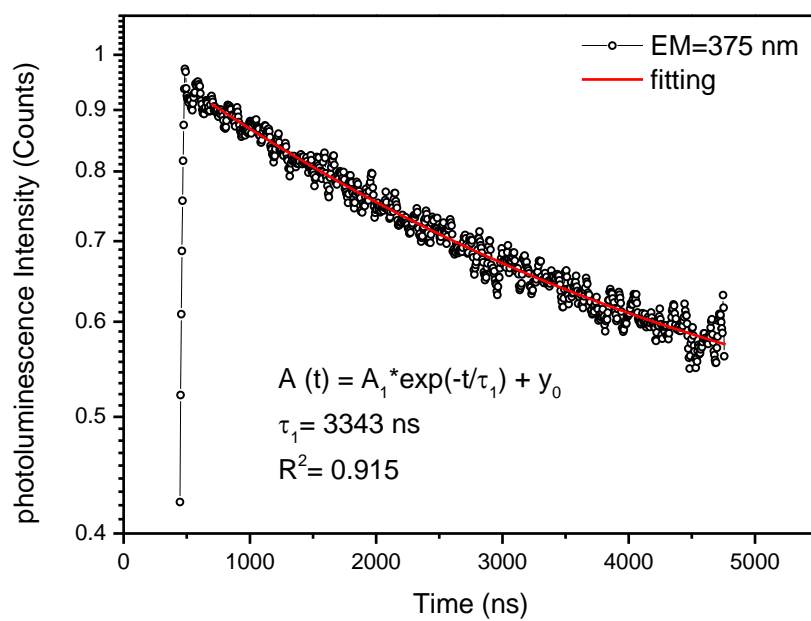

**Figure S7.** The time-resolved PL decay and fitting curves of (OCTAm)<sub>2</sub>SnBr<sub>4</sub> PS-perovskite composite film with PL emission maximum at 600 nm and excitation wavelength of 375 nm.

**Table S1.** Comparison of PLQYs values of various halide perovskites synthesized under different conditions.

| Materials                                                                         | Structural dimensions | Size          | PLQYs      | Synthesis conditions                 | Ref.      |
|-----------------------------------------------------------------------------------|-----------------------|---------------|------------|--------------------------------------|-----------|
| $\alpha$ -(DMEN)PbBr <sub>4</sub>                                                 | 2D                    | bulk          | --         | aqueous                              | S1        |
| (EDBE)PbBr <sub>4</sub>                                                           | 2D                    | bulk          | 9%         | aqueous                              | S2        |
| CH <sub>3</sub> NH <sub>3</sub> PbX <sub>3</sub>                                  | 3D                    | Nano-crystal  | 40%        | aqueous                              | S3        |
| CsPbBr <sub>3</sub>                                                               | 3D                    | Micro-crystal | 53.9%      | aqueous                              | S4        |
| (PEA) <sub>2</sub> SnI <sub>4</sub>                                               | 2D                    | Thin film     | 0.24%      | DMF                                  | S5        |
| HMD <sub>3</sub> SnBr <sub>8</sub>                                                | 2D                    | bulk          | 86%        | DMF/CH <sub>2</sub> Cl <sub>2</sub>  | S6        |
| (C <sub>4</sub> N <sub>2</sub> H <sub>14</sub> X) <sub>4</sub> SnX <sub>6</sub>   | 0D                    | bulk          | near unity | DMF/ CH <sub>2</sub> Cl <sub>2</sub> | S7        |
| (C <sub>18</sub> H <sub>35</sub> NH <sub>3</sub> ) <sub>2</sub> SnBr <sub>4</sub> | 2D                    | Micro-crystal | 88%        | octadecene                           | S8        |
| (OCTAm) <sub>2</sub> SnBr <sub>4</sub>                                            | 2D                    | bulk          | near unity | aqueous                              | This work |

#### References for supplementary information:

- S1. L. Mao, Y. Wu, C. C. Stoumpos, M. R. Wasielewski and M. G. Kanatzidis, *J. Am. Chem. Soc.*, 2017, **139**, 5210-5215.
- S2. E. R. Dohner, A. Jaffe, L. R. Bradshaw and H. I. Karunadasa, *J. Am. Chem. Soc.*, 2014, **136**, 13154-13157.
- S3. C. Geng, S. Xu, H. Zhong, A. L. Rogach and W. Bi, *Angew. Chem. Int. Ed.*, 2018, **57**, 9650-9654.
- S4. A. Jana and K. S. Kim, *ACS Energy Lett.*, 2018, **3**, 2120-2126.
- S5. L. Lanzetta, J. M. Marin-Beloqui, I. Sanchez-Molina, D. Ding and S. A. Haque, *ACS Energy Lett.*, 2017, **2**, 1662-1668.
- S6. P. Fu, M. Huang, Y. Shang, N. Yu, H.-L. Zhou, Y.-B. Zhang, S. Chen, J. Gong and Z. Ning, *ACS Appl. Mater. Interfaces*, 2018, **10**, 34363-34369.
- S7. C. Zhou, H. Lin, Y. Tian, Z. Yuan, R. Clark, B. Chen, L. J. van de Burgt, J. C. Wang, Y. Zhou, K. Hanson, Q. J. Meisner, J. Neu, T. Besara, T. Siegrist, E. Lambers, P. Djurovich and B. Ma, *Chem. Sci.*, 2018, **9**, 586-593.
- S8. X. Zhang, C. Wang, Y. Zhang, X. Zhang, S. Wang, M. Lu, H. Cui, S. V. Kershaw, W. W. Yu and A. L. Rogach, *ACS Energy Lett.*, 2018, **4**, 242-248.
